# Supplementary material for: Biosignals Emotive Human Control Interaction.
Source: MDPI journal article supplement (doi:10.3390/ijms242115557), 2005-01-01
Supplement: s1 [file s1]

**Effect of Reactive Oxygen Scavenger N,N'-Dimethylthiourea (DMTU) on Seed Germination and Radicle Elongation of Maize**

Wei-Qing Li <sup>1</sup>, Jia-Yu Li <sup>1</sup>, Yi-Fei Zhang <sup>1,2,\*</sup>, Wen-Qi Luo <sup>1</sup>, Yi Dou <sup>1</sup> and Song Yu <sup>1,2</sup>

**Table S2** Gene-specific primers for qRT-PCR

| Gene Name      | Forward (5' to 3')        | Reverse (5' to 3')        |
|----------------|---------------------------|---------------------------|
| <i>ZmSOD4</i>  | GATCTTGGAAGGGTGGACA       | GAAGTCCAGCGACCCATTT       |
| <i>ZmAPX2</i>  | CCCATCCTATCCTACGCTGA      | ATCAGGTCCGCCGGTTAC        |
| <i>ZmCAT2</i>  | ACGACATCACCCACCTGAC       | GGAGAAGCGGACGATGAC        |
| <i>ZmActin</i> | TACGAGATGCCTGATGGTCAGGTCA | TACGAGATGCCTGATGGTCAGGTCA |
